# Supplementary material
Source: ML conference proceedings conference paper supplement (https://proceedings.mlr.press/v84/nitanda18a.html)
Supplement: Supplementary file [file nitanda18a-supp.pdf]

## A The Other Usage

We introduce the usage that inserts a fixed number of gradient layers into the bottom of the generator to assist overall training procedure, which is described in Algorithm 1. Note that we always use latest parameters of  $f, g$  for gradient layers in Algorithm 1. When gradient layers are inserted in the middle of the generator:  $g_1 \circ \phi \circ g_2$ , we can apply Algorithm 1 by setting  $\mu_n \leftarrow g_2 \# \mu_n, g \leftarrow g_1$ . After training, we can generate samples by using parameters of the critic and the generator, the learning rate, and the number of gradient layers, which is described in Algorithm 2.

---

### Algorithm 1 Assisting WGAN-GP

---

**Input:** The base distribution  $\mu_n$ , the minibatch size  $b$ , the number of iterations  $T$ , the initial parameters  $\tau_0$  and  $\theta_0$  of the critic and the generator, the number of iterations  $T_0$  for the critic, the regularization parameter  $c$ , learning rate  $\eta$  for gradient layers, the number of gradient layers  $l$ .

**for**  $k = 0$  **to**  $T - 1$  **do**

$\tau \leftarrow \tau_k$

**for**  $k_0 = 0$  **to**  $T_0 - 1$  **do**

$\{x_i\}_{i=1}^b \sim \mu_D^b, \{z_i\}_{i=1}^b \sim \mu_n^b, \{\epsilon_i\}_{i=1}^b \sim U[0, 1]^b$

#  $G_{\eta}^{\tau_k, \theta_k}$  is applied  $l$  times.

$\{z_i\}_{i=1}^b \leftarrow \{g_{\theta_k} \circ G_{\eta}^{\tau_k, \theta_k} \circ \dots \circ G_{\eta}^{\tau_k, \theta_k}(z_i)\}_{i=1}^b$

$\{\tilde{x}_i\}_{i=1}^b \leftarrow \{\epsilon_i x_i + (1 - \epsilon_i) z_i\}_{i=1}^b$

$v = \nabla_{\tau} \frac{1}{b} \sum_{i=1}^b [f_{\tau}(z_i) - f_{\tau}(x_i) + \lambda R_{f_{\tau}}(\tilde{x}_i)]$

$\tau \leftarrow \mathcal{A}(\tau, v)$

**end for**

$\tau_{k+1} \leftarrow \tau$

$\{z_i\}_{i=1}^b \sim \mu_n^b$

#  $G_{\eta}^{\tau_{k+1}, \theta_k}$  is applied  $l$  times.

$\{z_i\}_{i=1}^b \leftarrow \{G_{\eta}^{\tau_{k+1}, \theta_k} \circ \dots \circ G_{\eta}^{\tau_{k+1}, \theta_k}\}_{i=1}^b$

$v \leftarrow -\nabla_{\theta} \frac{1}{b} \sum_{i=1}^b f_{\tau_{k+1}}(g_{\theta_k}(z_i))$

$\theta_{k+1} \leftarrow \mathcal{A}(\theta_k, v)$

**end for**

Return  $\tau_T, \theta_T$ .

---



---

### Algorithm 2 Data Generation for Algorithm 1

---

**Input:** the seed drawn from the base measure  $z \sim \mu_n$ , the parameter  $\tau$  and  $\theta$  of the critic and the generator, the learning rate  $\eta$ , the number of gradient layers  $l$ .

Apply gradient layers  $l$  times  $z' \leftarrow G_{\eta}^{\tau, \theta} \circ \dots \circ G_{\eta}^{\tau, \theta}(z)$

Return the sample  $g_{\theta}(z')$ .

---

We next briefly review Algorithm 1 in which a fixed number of gradient layers with latest parameters is inserted in the bottom of a generator of WGAN-GP. That is, gradient layers modify a noise distribution  $\mu_n$  to improve the quality of a generator by the functional gradient method.

## B Brief Review of Wasserstein Distance

We introduce some facts concerning the Wasserstein distance, which is used for the proof of Proposition 2. We first describe a primal form of the Wasserstein distance. For  $p \geq 1$  let  $\mathcal{P}_p$  be the set of Borel probability measures with finite  $p$ -the moment on  $\mathcal{X} \subset \mathbb{R}^v$ . For  $\mu, \nu \in \mathcal{P}_p$  a probability measure  $\gamma$  on  $\mathcal{X} \times \mathcal{X}$  satisfying  $\pi_{\#}^1 \gamma = \mu$  and  $\pi_{\#}^2 \gamma = \nu$  is called a *plan (coupling)*, where  $\pi^i$  denotes the projection from  $\mathcal{X} \times \mathcal{X}$  to the  $i$ -th space  $\mathcal{X}$ . We denote by  $\Gamma(\mu, \nu)$  the set of all plans between  $\mu$  and  $\nu$ . We now introduce Kantorovich's formulation

of the  $p$ -Wasserstein distance  $W_p$  for  $p \geq 1$ .

$$W_p^p(\mu, \nu) = \min_{\gamma \in \Gamma(\mu, \nu)} \int_{\mathcal{X} \times \mathcal{X}} \|x - y\|_2^p d\gamma(x, y) \quad (1)$$

When  $p = 1$  and  $\mu, \nu$  have bounded supports, there is the Kantorovich-Rubinstein dual formulation of the 1-Wasserstein distance, which coincide with the definition introduced in the paper. The existence of optimal plans is guaranteed under more general integrand (c.f. [6, 2]) and we denote by  $\Gamma$  the set of optimal plans. Prior to this formulation, the optimal transport problem in Monge's formulation was proposed.

$$\inf_{\phi_{\#}\mu = \nu} \int_{\mathcal{X}} \|x - \phi(x)\|_2^p d\mu(x), \quad (2)$$

where the infimum is taken over all transport maps  $\phi : \mathcal{X} \rightarrow \mathcal{X}$  from  $\mu$  to  $\nu$ , i.e.,  $\phi_{\#}\mu = \nu$ . Because a transport map  $\phi$  gives a plan  $\gamma = (id \times \phi)_{\#}\mu$ , we can easily find (1)  $\leq$  (2). In general, an optimal transport map that solves the problem (2) does not always exist unlike Kantorovich problem (1). However, in the case where  $p > 1$ ,  $\mathcal{X} = \mathbb{R}^v$ , and  $\mu$  is absolutely continuous with respect to the Lebesgue measure, the existence of optimal transport maps is guaranteed [3, 4] and it is extended to more general integrand (see [2]). Moreover, this optimal transport map also solves Kantorovich problem (1), i.e., these two distances coincide. On the other hand, in the case  $p = 1$ , the existence of optimal transport maps is much more difficult, but it is shown in limited settings as follows.

**Proposition A** (Sudakov [5], see also [1]). *Let  $\mathcal{X}$  be a compact convex subset in  $\mathbb{R}^v$  and assume that  $\mu$  is absolutely continuous with respect to Lebesgue measure. Then, there exists an optimal transport map  $\phi$  from  $\mu$  to  $\nu$  for the problem 2 with  $p = 1$ . Moreover, if  $\nu$  is also absolutely continuous with respect to Lebesgue measure, we can choose  $\psi$  so that  $\psi^{-1}$  is well defined  $\mu_0$ -a.e., and  $\phi_{\#}^{-1}\nu = \mu$ .*

Under the same assumption in Proposition A, it is known that two distances (2) and (1) coincide [1], that is, the Kantorovich problem (1) is solved by an optimal transport map.

## C Proofs

We here the give proof of Proposition 1.

*Proof of Proposition 1.* Note that  $\mathcal{L}(\psi) = \hat{\mathcal{L}}(f_{\psi}^*, \psi)$ . For  $\psi \in B_r^{\infty}(\phi)$ , we divide  $\mathcal{L}(\psi)$  into two terms as follows.

$$\mathcal{L}(\psi) = (\hat{\mathcal{L}}(f_{\psi}^*, \psi) - \hat{\mathcal{L}}(f_{\phi}^*, \psi)) + \hat{\mathcal{L}}(f_{\phi}^*, \psi). \quad (3)$$

We first bound the first term in (3) by  $L$ -smoothness of  $\hat{\mathcal{L}}(f_{\psi'}^*, \psi)$  with respect to  $\psi'$  at  $\psi$  in  $B_r^{\infty}(\psi)$ .

$$\left| \hat{\mathcal{L}}(f_{\phi}^*, \psi) - (\hat{\mathcal{L}}(f_{\psi}^*, \psi) + \langle \nabla_{\psi'} \hat{\mathcal{L}}(f_{\psi'}^*, \psi) \Big|_{\psi'=\psi}, \phi - \psi \rangle_{L^2(\mu_g)}) \right| \leq \frac{L}{2} \|\phi - \psi\|_{L^2(\mu_g)}^2.$$

Since  $\hat{\mathcal{L}}(f_{\psi'}^*, \psi)$  attains the maximum, we have  $\nabla_{\psi'} \hat{\mathcal{L}}(f_{\psi'}^*, \psi) \Big|_{\psi'=\psi} = 0$  and have

$$\left| \hat{\mathcal{L}}(f_{\phi}^*, \psi) - \hat{\mathcal{L}}(f_{\psi}^*, \psi) \right| \leq \frac{L}{2} \|\phi - \psi\|_{L^2(\mu_g)}^2. \quad (4)$$

We next bound  $\hat{\mathcal{L}}(f_{\phi}^*, \psi)$  in (3). We remember that

$$\hat{\mathcal{L}}(f_{\phi}^*, \psi) = \mathbb{E}_{x \sim \mu_D} [f_{\phi}^*(x)] - \mathbb{E}_{x \sim \mu_g} [f_{\phi}^* \circ \psi(x)] - \lambda R_{f_{\phi}^*}. \quad (5)$$

By  $L$ -smoothness of  $f_{\phi}^*$ , it follows that

$$\left| f_{\phi}^*(\psi(x)) - (f_{\phi}^*(\phi(x)) + \langle \nabla_z f_{\phi}^*(z) \Big|_{z=\phi(x)}, \psi(x) - \phi(x) \rangle_2) \right| \leq \frac{L}{2} \|\psi(x) - \phi(x)\|_2^2.$$

By taking the expectation with respect to  $\mathbb{E}_{\mu_g}$ , we get

$$|-\mathbb{E}_{x \sim \mu_g}[f_\phi^* \circ \psi(x)] + \mathbb{E}_{\mu_g}[f_\phi^*(\phi(x))] + \langle \nabla_z f_\phi^* \circ \phi, \psi - \phi \rangle_{L^2(\mu_g)}| \leq \frac{L}{2} \|\psi - \phi\|_{L^2(\mu_g)}^2.$$

We substitute this inequality into (5), we have

$$\begin{aligned} \hat{\mathcal{L}}(f_\phi^*, \psi) &\leq \mathbb{E}_{x \sim \mu_D}[f_\phi^*(x)] + \frac{L}{2} \|\psi - \phi\|_{L^2(\mu_g)}^2 - (\mathbb{E}_{\mu_g}[f_\phi^*(\phi(x))] + \langle \nabla_z f_\phi^* \circ \phi, \psi - \phi \rangle_{L^2(\mu_g)}) - \lambda R f_\phi^* \\ &= \hat{\mathcal{L}}(f_\phi^*, \phi) - \langle \nabla_z f_\phi^* \circ \phi, \psi - \phi \rangle_{L^2(\mu_g)} + \frac{L}{2} \|\psi - \phi\|_{L^2(\mu_g)}^2 \\ &= \mathcal{L}(\phi) + \langle \nabla_\phi \mathcal{L}(\phi), \psi - \phi \rangle_{L^2(\mu_g)} + \frac{L}{2} \|\psi - \phi\|_{L^2(\mu_g)}^2, \end{aligned} \quad (6)$$

and the opposite inequality

$$\hat{\mathcal{L}}(f_\phi^*, \psi) \geq \mathcal{L}(\phi) + \langle \nabla_\phi \mathcal{L}(\phi), \psi - \phi \rangle_{L^2(\mu_g)} - \frac{L}{2} \|\psi - \phi\|_{L^2(\mu_g)}^2, \quad (7)$$

where we used  $\nabla_\phi \mathcal{L}(\phi) = -\nabla_z f_\phi^*(z)|_{z=\phi(\cdot)}$ . By combining (3),(4), and (6), we have

$$\mathcal{L}(\psi) \leq \mathcal{L}(\phi) + \langle \nabla_\phi \mathcal{L}(\phi), \psi - \phi \rangle_{L^2(\mu_g)} + L \|\phi - \psi\|_{L^2(\mu_g)}^2.$$

Moreover, since  $\hat{\mathcal{L}}(f_\psi^*, \psi) - \hat{\mathcal{L}}(f_\phi^*, \psi) \geq 0$  in (3), we have  $\mathcal{L}(\psi) \geq \hat{\mathcal{L}}(f_\phi^*, \psi)$ . Therefore, we get the opposite inequality by (7)

$$\mathcal{L}(\psi) \geq \mathcal{L}(\phi) + \langle \nabla_\phi \mathcal{L}(\phi), \psi - \phi \rangle_{L^2(\mu_g)} - \frac{L}{2} \|\phi - \psi\|_{L^2(\mu_g)}^2.$$

This finishes the proof.  $\square$

We next provide the proof of Theorem 1.

*Proof of Theorem 1.* Noting that  $\|\eta \nabla_{\phi_k} \mathcal{L}(\phi_k)\|_\infty \leq r$  and Lipschitz smoothness of  $\mathcal{L}$ , we have

$$\begin{aligned} \mathcal{L}(\phi_{k+1}) &\leq \mathcal{L}(\phi_k) - \eta \|\nabla_\phi \mathcal{L}(\phi_k)\|_{L^2(\mu_g)}^2 + \frac{\eta^2 L}{2} \|\nabla_\phi \mathcal{L}(\phi_k)\|_{L^2(\mu_g)} \\ &= \mathcal{L}(\phi_k) - \eta(1 - \eta L/2) \|\nabla_\phi \mathcal{L}(\phi_k)\|_{L^2(\mu_g)}^2. \end{aligned}$$

Since  $\eta \leq 1/L$ , we have  $\mathcal{L}(\phi_{k+1}) \leq \mathcal{L}(\phi_k) - \frac{\eta}{2} \|\nabla_\phi \mathcal{L}(\phi_k)\|_{L^2(\mu_g)}^2$ . Summing up over  $k \in \{0, \dots, T-1\}$  and dividing by  $T$  we obtain

$$\frac{1}{T} \sum_{k=0}^{T-1} \|\nabla_\phi \mathcal{L}(\phi_k)\|_{L^2(\mu_g)}^2 \leq \frac{2}{\eta T} (\mathcal{L}(\phi_0) - \mathcal{L}(\phi_T)).$$

This inequality finishes the proof of the theorem.  $\square$

*Proof of Proposition 2.* By Proposition A, there exists an optimal transport  $\psi$  from  $\mu_g$  to  $\mu_D$  and an optimal plan is given by  $\gamma = (id \times \psi)_{\#} \mu_g$ . We set  $\psi_t = (1-t)id + t\psi$  and  $\mu_t = \psi_{t\#} \mu_g$ . Because  $(\psi_s, \psi_t)_{\#} \mu_g$  ( $0 \leq s < t \leq 1$ ) gives a plan between  $\mu_g$  and  $\mu_D$ , we have

$$\begin{aligned} W_1(\mu_s, \mu_t) &\leq \int_{\mathcal{X} \times \mathcal{X}} \|x - y\|_2 d(\psi_s, \psi_t)_{\#} \mu_g \\ &= \int_{\mathcal{X}} \|\psi_s(x) - \psi_t(x)\|_2 d\mu_g \\ &= (t-s) \int_{\mathcal{X}} \|x - \psi(x)\|_2 d\mu_g = (t-s) W_1(\mu_g, \mu_D). \end{aligned} \quad (8)$$

We next prove the opposite inequality. Noting that  $(id, \psi_s)_\# \mu_g$  is a plan from  $\mu_g$  to  $\mu_s$  and  $(\psi_t, \psi)_\# \mu_g$  is a plan from  $\mu_t$  to  $\mu_D$ , we have the following two inequalities

$$W_1(\mu_g, \mu_s) \leq \int_{\mathcal{X} \times \mathcal{X}} \|x - y\|_2 d(id, \psi_s)_\# \mu_g = \int_{\mathcal{X}} \|x - \psi_s(x)\|_2 d\mu_g = sW_1(\mu_g, \mu_D),$$

$$W_1(\mu_t, \mu_D) \leq \int_{\mathcal{X} \times \mathcal{X}} \|x - y\|_2 d(\psi_t, \psi)_\# \mu_g = \int_{\mathcal{X}} \|\psi_t(x) - \psi(x)\|_2 d\mu_g = (1 - t)W_1(\mu_g, \mu_D).$$

Using these two inequalities and the triangle inequality, we get

$$W_1(\mu_g, \mu_D) \leq W_1(\mu_g, \mu_s) + W_1(\mu_s, \mu_t) + W_1(\mu_t, \mu_D) \leq (1 + s - t)W_1(\mu_g, \mu_D) + W_1(\mu_s, \mu_t).$$

That is  $(t - s)W_1(\mu_g, \mu_D) \leq W_1(\mu_s, \mu_t)$ . By combining this inequality and (8), we have  $(t - s)W_1(\mu_g, \mu_D) = W_1(\mu_s, \mu_t)$  and this finishes the proof.  $\square$

## D Labeled Faces in the Wild

In this section we provide the result on the Labeled Faces in the Wild dataset. The result is shown in Figure 1. After training WGAN-GP (left), we ran Algorithm 3 for a few iterations (right).

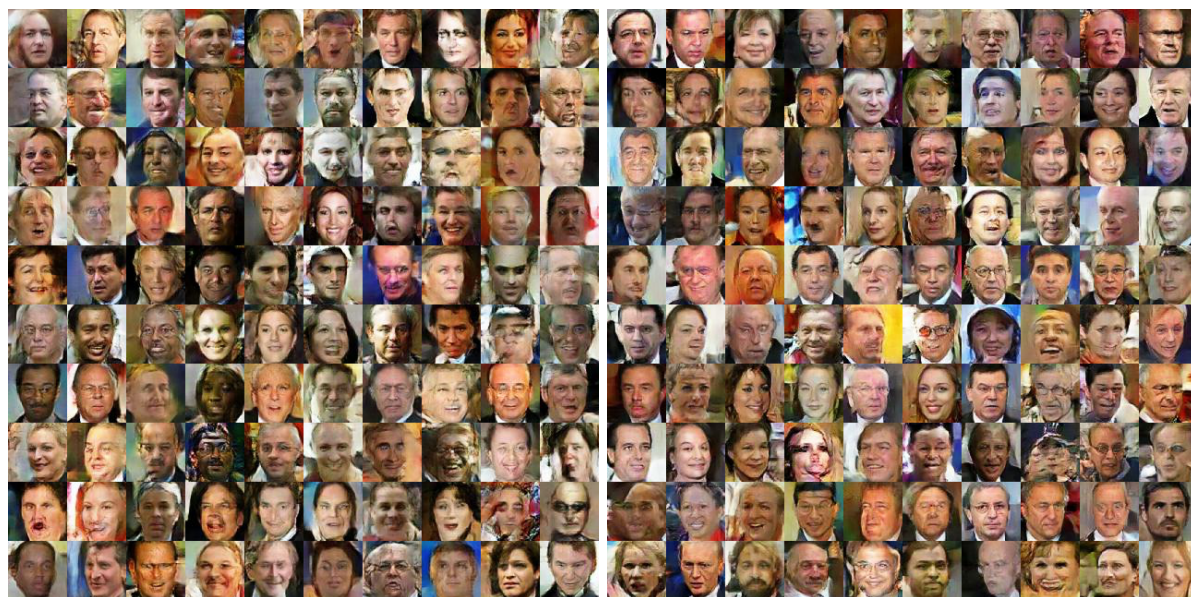

Figure 1: Random samples drawn from the generator trained by WGAN-GP (left) and the gradient layer (right).

## References

- [1] Luigi Ambrosio. Lecture notes on optimal transport problems. In *Mathematical aspects of evolving interfaces*, pages 1–52. Springer, 2003.
- [2] Luigi Ambrosio, Nicola Gigli, and Giuseppe Savaré. *Gradient flows: in metric spaces and in the space of probability measures*. Springer Science & Business Media, 2008.
- [3] Yann Brenier. Décomposition polaire et réarrangement monotone des champs de vecteurs. *CR Acad. Sci. Paris Sér. I Math*, 305(19):805–808, 1987.

- [4] Yann Brenier. Polar factorization and monotone rearrangement of vector-valued functions. *Communications on pure and applied mathematics*, 44(4):375–417, 1991.
- [5] Vladimir N Sudakov. *Geometric problems in the theory of infinite-dimensional probability distributions*. Number 141. American Mathematical Soc., 1979.
- [6] Cédric Villani. *Optimal transport: old and new*, volume 338. Springer Science & Business Media, 2008.
